# Supplementary material for: Staphylococcus hsinchuensis sp. nov., Isolated from Soymilk
Source: MDPI journal article supplement (doi:10.3390/pathogens13040343), 2024-04-21
Supplement: s1 [file s1]

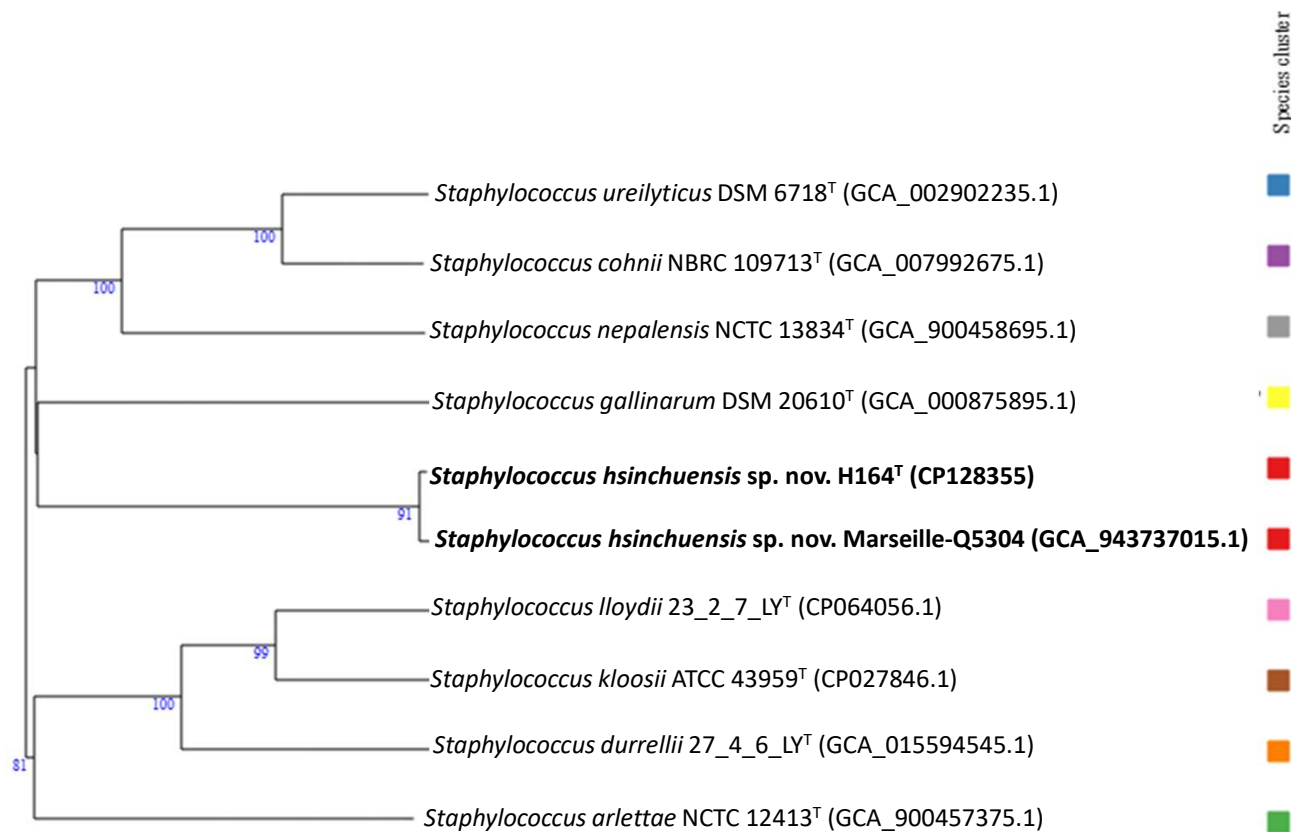

**Supplementary Figure. S1.** Phylogenomic tree based on TYGS results showing the relationship between *Staphylococcus hsinchuensis* sp. nov. and its phylogenetically related species. The tree was inferred with FastME 2.1.6.1 from GBDP distances calculated from genome sequences. The branch lengths are scaled in terms of GBDP distance formula  $d_5$ . The tree was rooted at the midpoint.

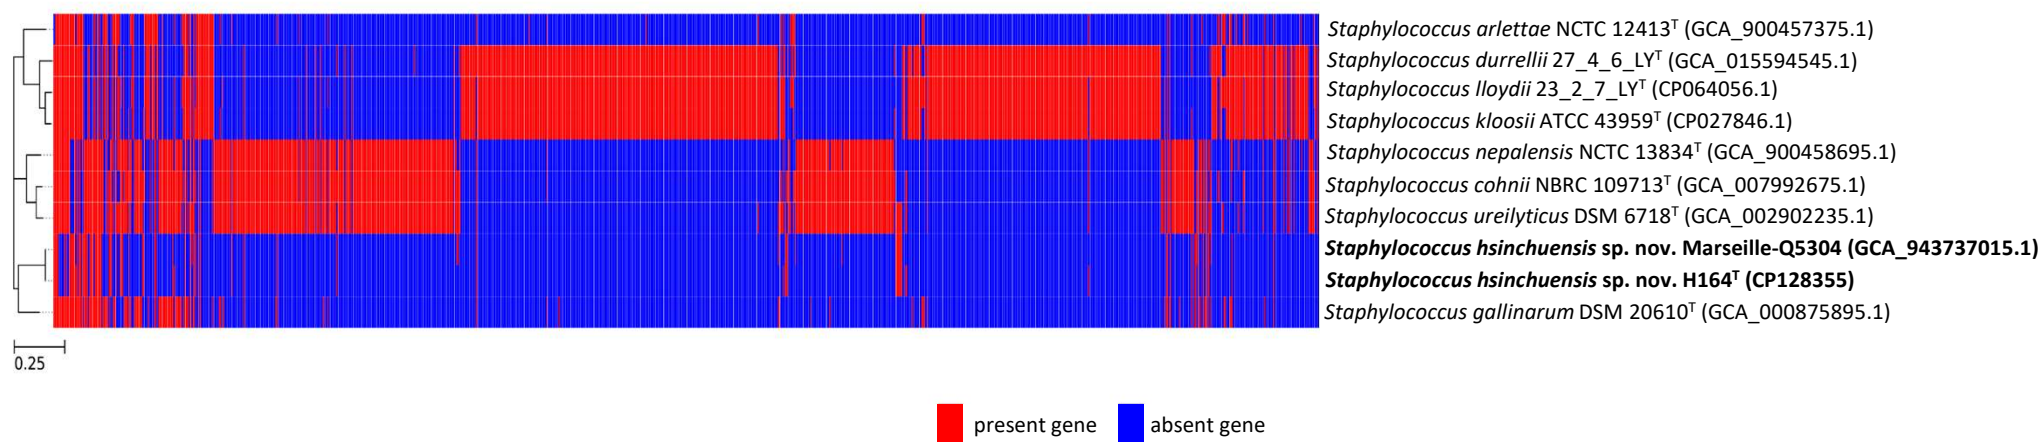

**Supplementary Figure. S2.** Heat map and NJ dendrogram of the analyzed eight *Staphylococcus* strains based on the presence or absence of genes.

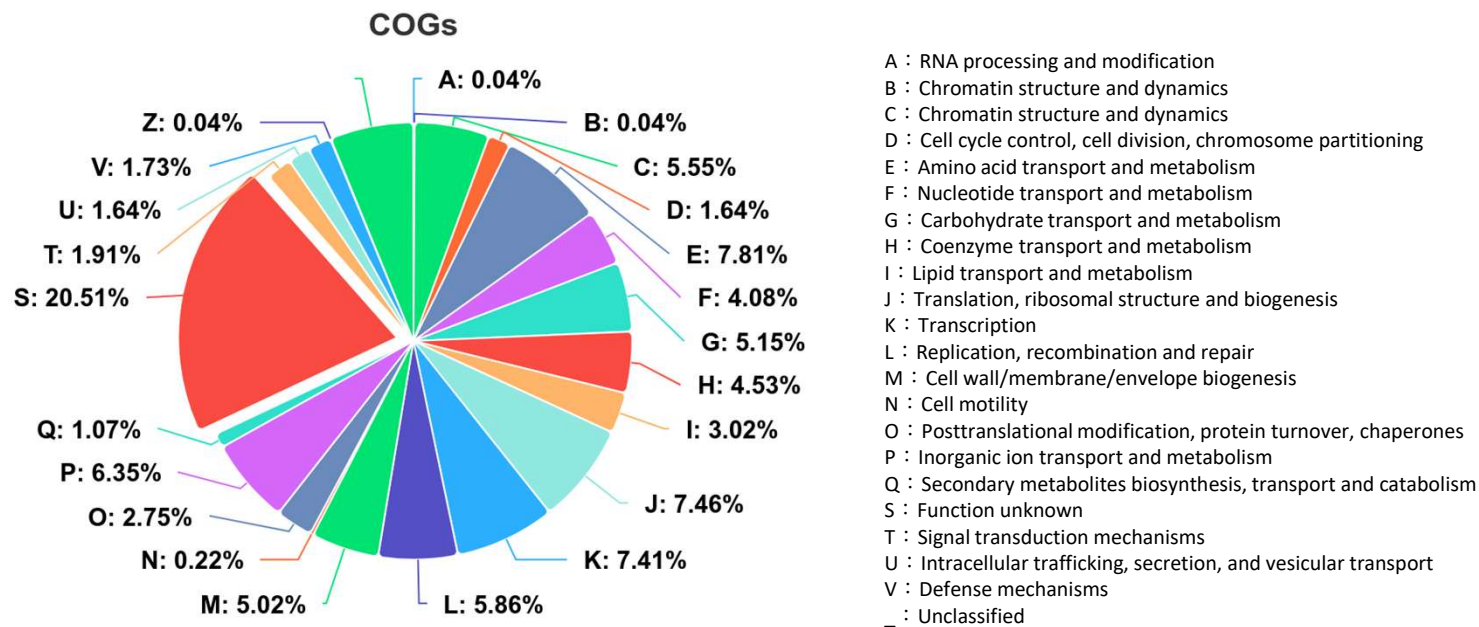

**Supplementary Figure. S3.** Results of an eggNOG functional category analysis of strain H164<sup>T</sup>. The major two parts of 2,114 COG categories in strains H164<sup>T</sup>, are E (Amino acid transport and metabolism), J (Translation, ribosomal structure and biogenesis) and K (Transcription).

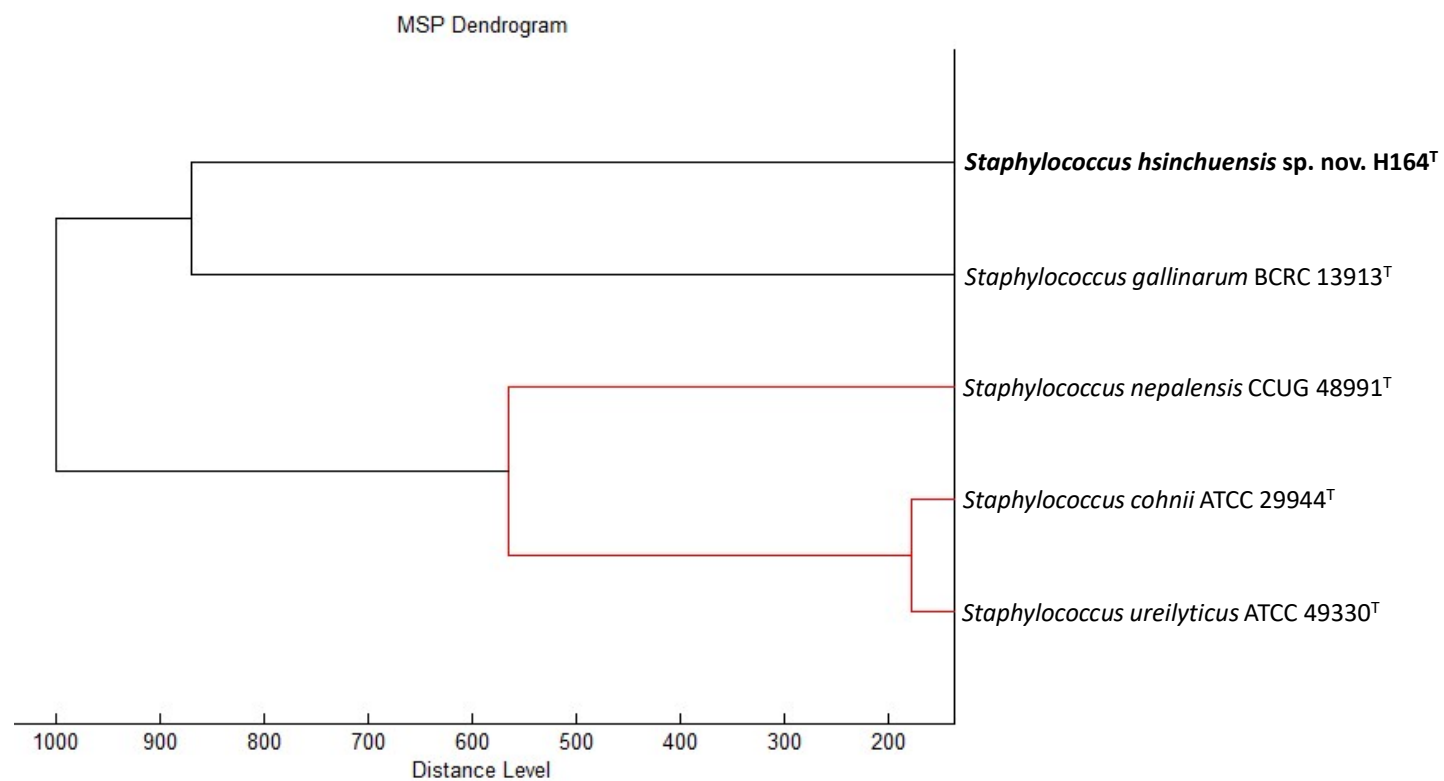

**Supplementary Figure S4.** Dendrogram showing the clustering of the *Staphylococcus* strains based on MALDI-TOF MS analysis.
